# Supplementary material for: Enhanced electrochemical reduction of CO2to CO on Ag electrocatalysts with increased unoccupied density of states
Source: Royal Society of Chemistry journal article supplement (doi:10.1039/c6ta04325a), 2016-01-01
Supplement: c6ta04325a1.pdf [file c6ta04325a1.pdf]

## Supporting information

### Enhanced electrochemical reduction of CO<sub>2</sub> to CO on Ag electrocatalysts with increased unoccupied density of state

Kun Sun,<sup>a,†</sup> Lina Wu,<sup>b,†</sup> Wu Qin,<sup>c</sup> Jigang Zhou,<sup>d</sup> Yongfeng Hu,<sup>d</sup> Zhaohua Jiang,<sup>a</sup> Baozhong Shen<sup>b</sup> and Zhijiang Wang<sup>\*a,e</sup>

<sup>a</sup>MIT Key Laboratory of Critical Materials Technology for New Energy Conversion and Storage, School of Chemistry and Chemical Engineering, Harbin Institute of Technology, Harbin 150001, China;

<sup>b</sup>Department of Radiology, Molecular Imaging Research Center of Harbin Medical University, the Fourth Hospital of Harbin Medical University, Harbin 150001, China;

<sup>c</sup>National Engineering Laboratory for Biomass Power Generation Equipment, School of Renewable Energy, North China Electric Power University, Beijing 102206, China;

<sup>d</sup>Canadian Light Source Inc., Saskatoon, Saskatchewan S7N 0X4, Canada;

<sup>e</sup>Department of Chemistry, University of Oxford, South Parks Road, Oxford OX1 3QR, United Kingdom.

\*Corresponding author: Tel.&Fax: +86 451 86418409.

E-mail address: wangzhijiang@hit.edu.cn (Z. Wang)

† These authors contributed equally to this work.

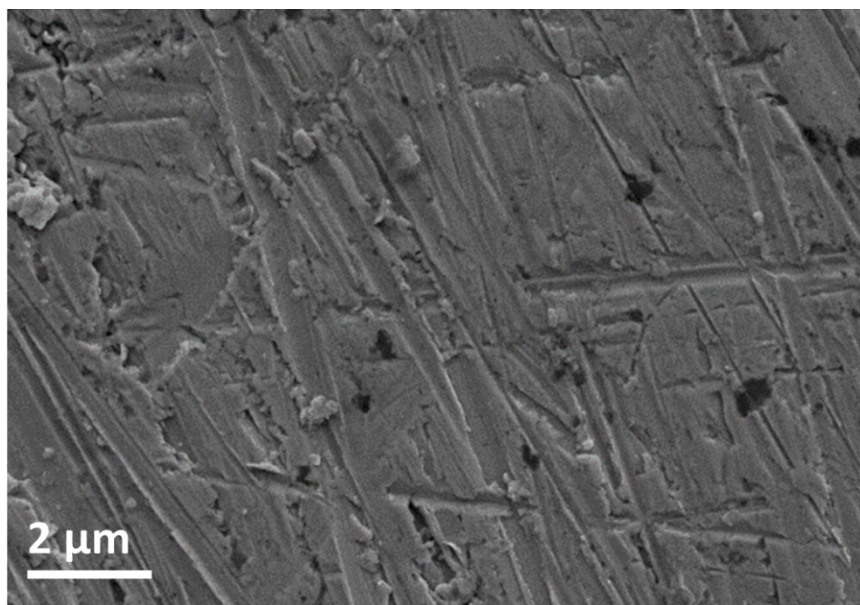

Figure S1. SEM image of polished Ag foil.

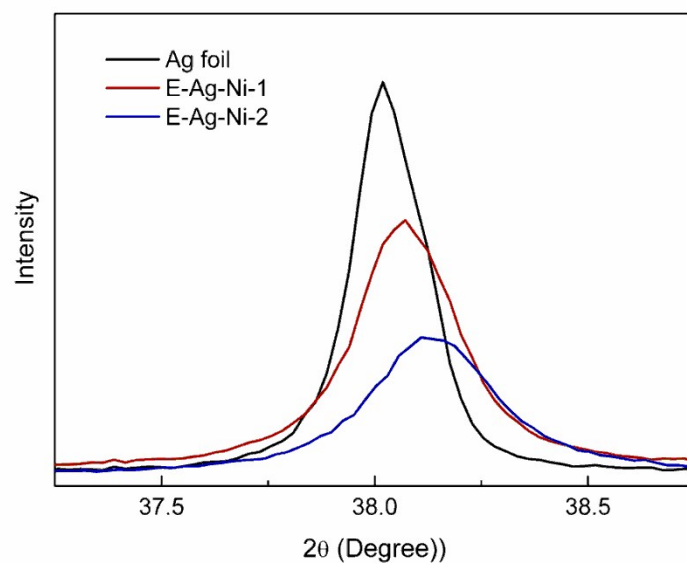

Figure S2. Enlarged (111) diffraction peaks of Ag foil, E-Ag-Ni-1 and E-Ag-Ni-2.

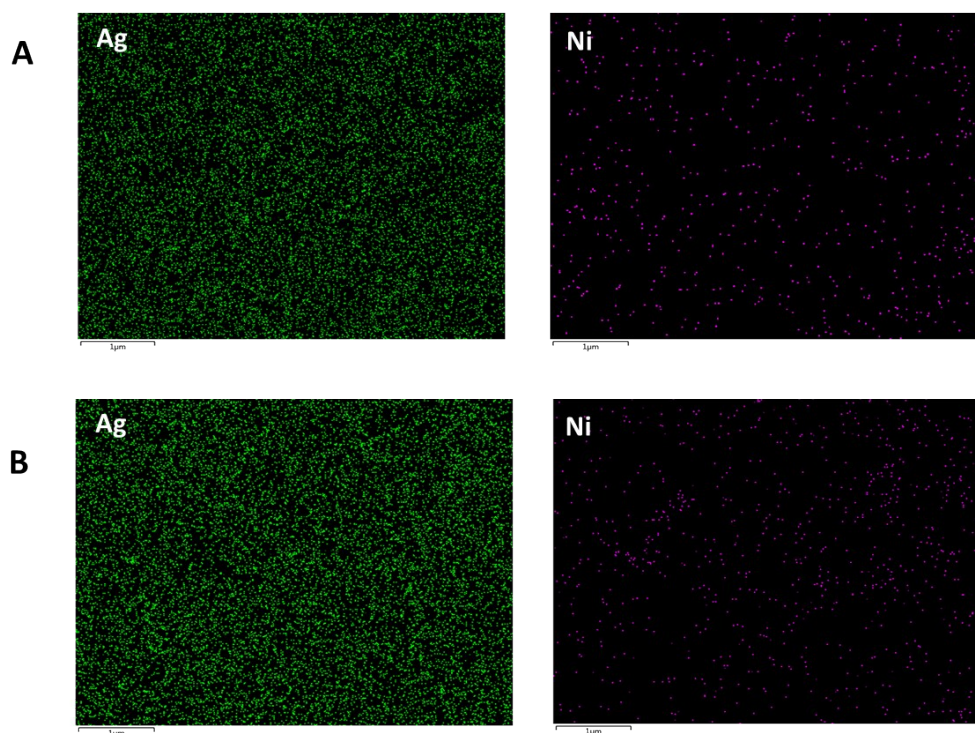

Figure S3. EDS mapping analysis on elements of Ag and Ni for (A) E-Ag-Ni-1 and (B) E-Ag-Ni-2. The elements concentrations of Ag and Ni in E-Ag-Ni-1 are determined to be 95.7 At% and 4.3 At%, respectively. In E-Ag-Ni-2, Ag is 92.9 At% and Ni is 7.1 At%.

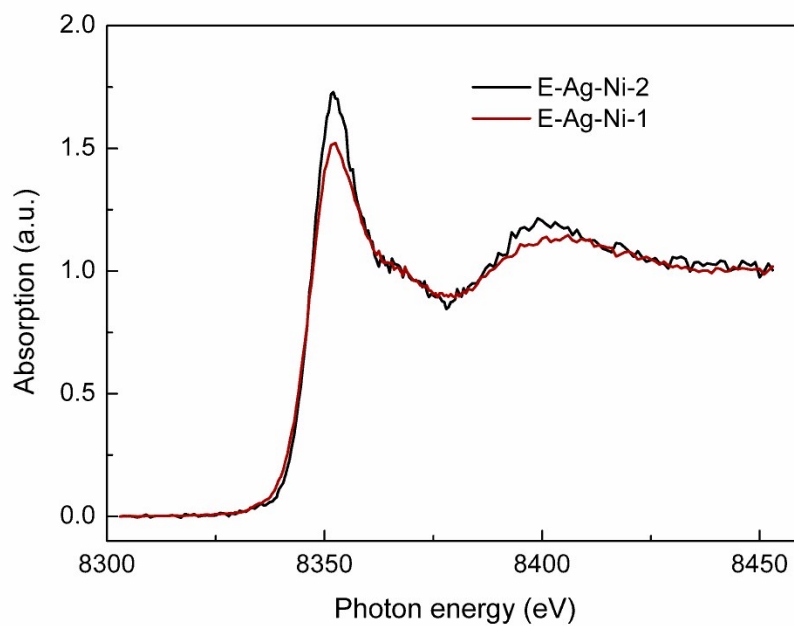

Figure S4. Ni *K*-edge XANES spectra of E-Ag-Ni confirm that the co-deposited Ni is uniformly distributed in Ag matrix.

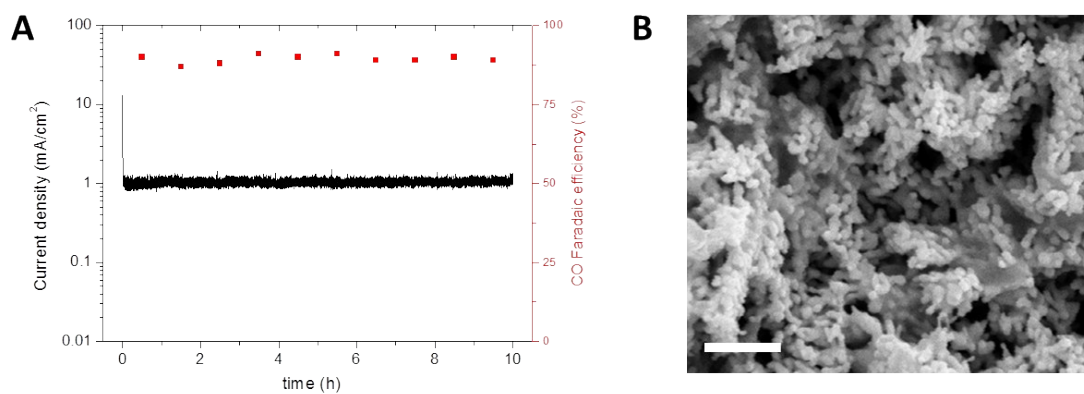

Figure S5. (A) Total current density vs time and FE for CO vs time at -0.8 V vs RHE for An-red-Ag; (B) SEM image of the An-red-Ag electrode after 10-hour electrolysis. The scale bar is 500 nm.
